# Supplementary material for: Global riverine N and P transport to ocean increased during the 20th century despite increased retention along the aquatic continuum
Source: Copernicus journal article supplement (doi:10.5194/bg-13-2441-2016), 2016-04-27
Supplement: Supplementary file 5 [file bg-13-2441-2016-supplement.zip]

### Arctic Ocean

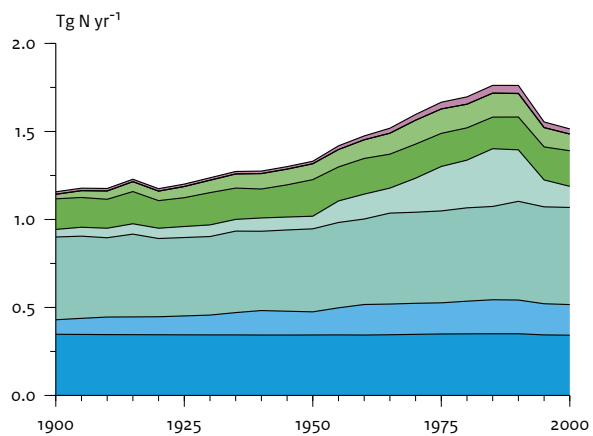

### Atlantic Ocean

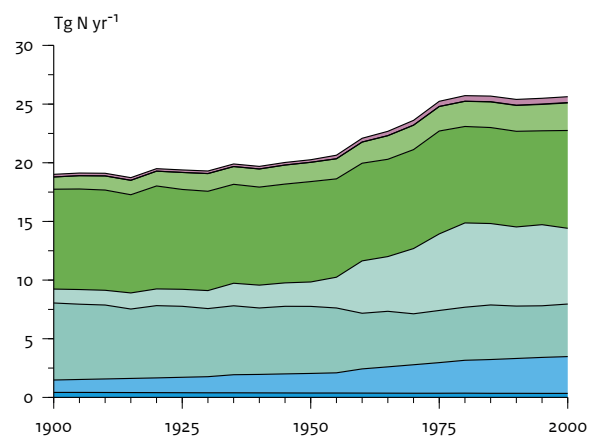

### Indian Ocean

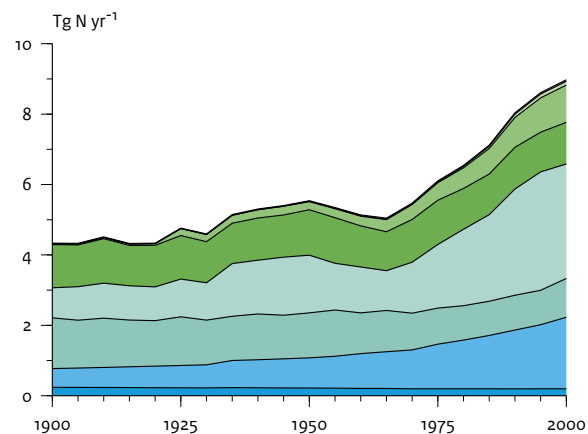

### Mediterranean Sea and Black Sea

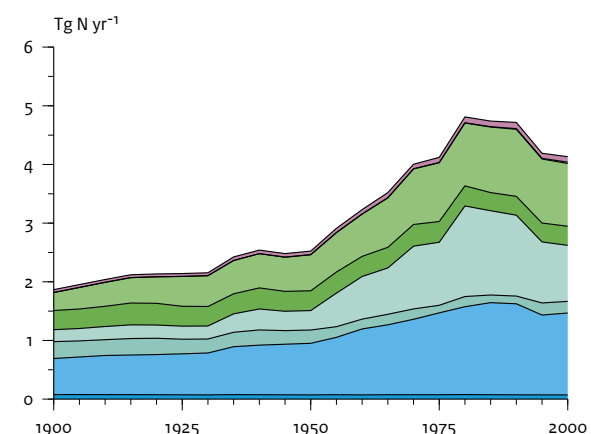

### Pacific Ocean

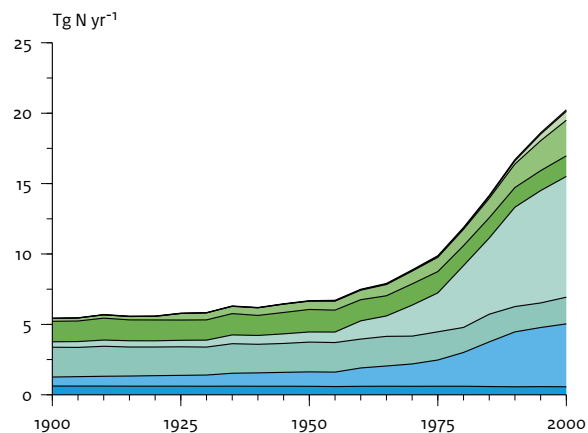

### Endorheic systems

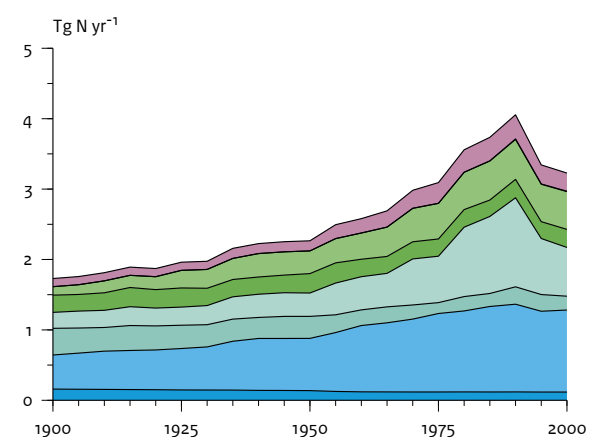

### Global

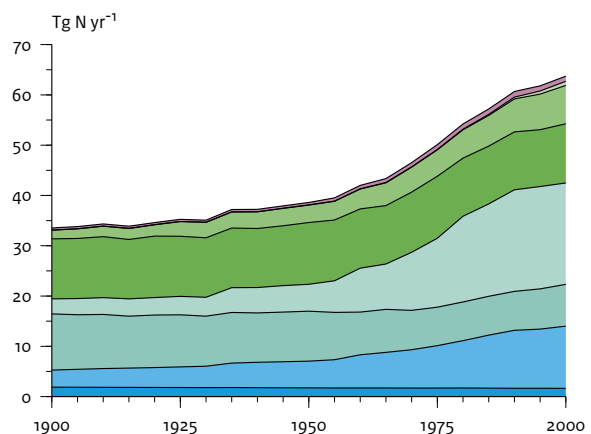

- Atmospheric deposition
- Aquaculture
- Sewage
- Vegetation in floodplains
- Groundwater (agriculture)
- Groundwater (natural)
- Surface runoff (agriculture)
- Surface runoff (natural)
