# Supplementary material for: Global riverine N and P transport to ocean increased during the 20th century despite increased retention along the aquatic continuum
Source: Copernicus journal article supplement (doi:10.5194/bg-13-2441-2016), 2016-04-27
Supplement: Supplementary file 6 [file bg-13-2441-2016-supplement.zip]

Arctic Ocean

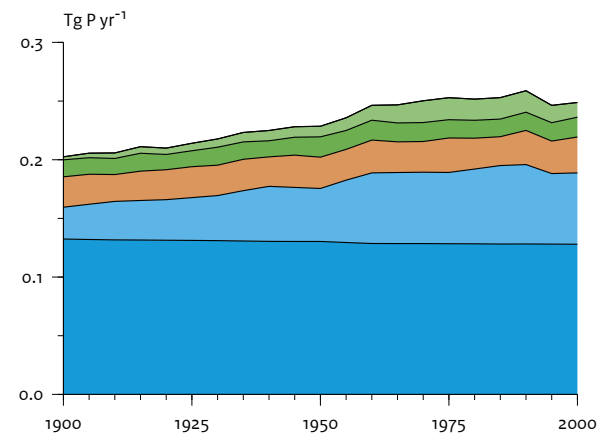

Atlantic Ocean

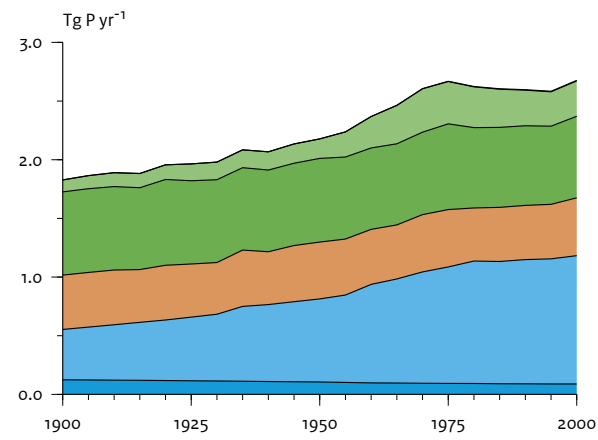

Indian Ocean

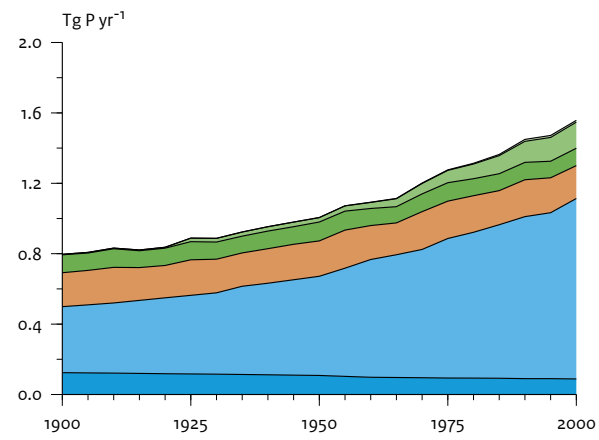

Mediterranean Sea and Black Sea

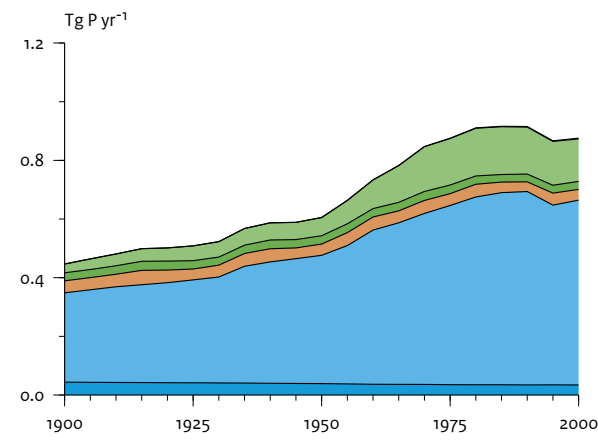

Pacific Ocean

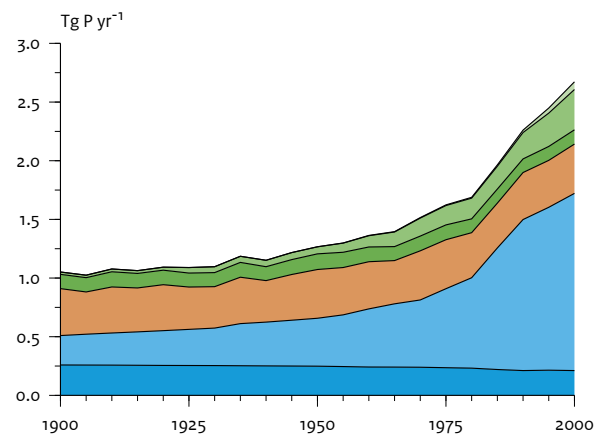

Endorheic systems

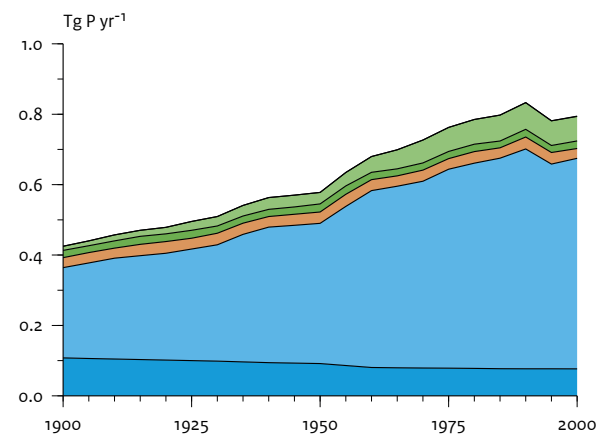

Global

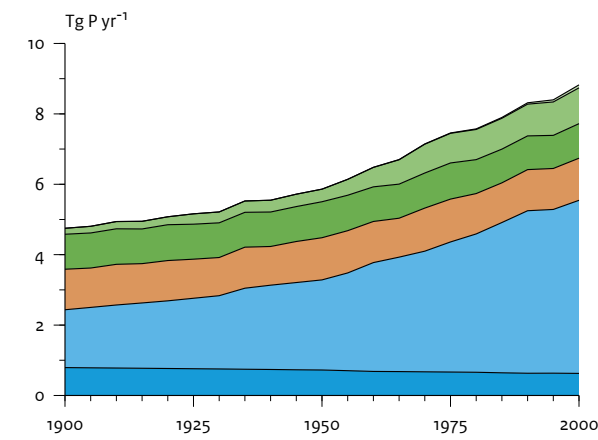

- Aquaculture
- Sewage
- Vegetation in floodplains
- Weathering
- Surface runoff (agriculture)
- Surface runoff (natural)
