# Supplementary material for: Global riverine N and P transport to ocean increased during the 20th century despite increased retention along the aquatic continuum
Source: Copernicus journal article supplement (doi:10.5194/bg-13-2441-2016), 2016-04-27
Supplement: Supplementary file 7 [file bg-13-2441-2016-supplement.zip]

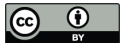

## *Supplement of*

# **Global riverine N and P transport to ocean increased during the 20th century despite increased retention along the aquatic continuum**

**Arthur H. W. Beusen et al.**

*Correspondence to:* A. H. W. Beusen (arthur.beusen@pbl.nl)

- bg-13-2441-2016-supplement-title-page.pdf
- Beusen\_Supplement
  - Beusen\_BG\_Si.pdf
  - FigureSI2\_overview\_oceans\_N.pdf
  - FigureSI3\_overview\_oceans\_P.pdf
  - FigureSI4\_NPratio\_delivery.pdf
  - FigureSI5\_NPratio\_oceans.pdf
  - Figure\_SI1\_change\_soil\_P.pdf
  - Movie\_SI1\_Ndelivery\_grid.gif
  - Movie\_SI2\_Pdelivery\_grid.gif
  - Movie\_SI3\_Ndominant\_src.gif
  - Movie\_SI4\_Pdominant\_src.gif

The copyright of individual parts of the supplement might differ from the CC-BY 3.0 licence.
