# Supplementary figures and images for: Global riverine N and P transport to ocean increased during the 20th century despite increased retention along the aquatic continuum
Source: Copernicus journal article supplement (doi:10.5194/bg-13-2441-2016), 2016-04-27

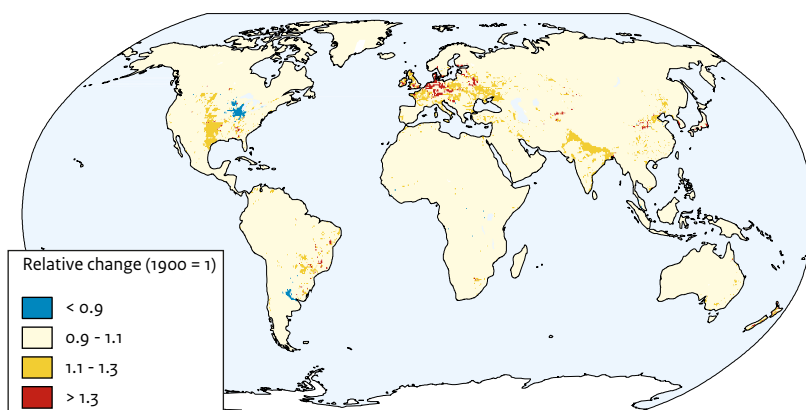

Supplement: Supplementary file 1 [file bg-13-2441-2016-supplement.zip]

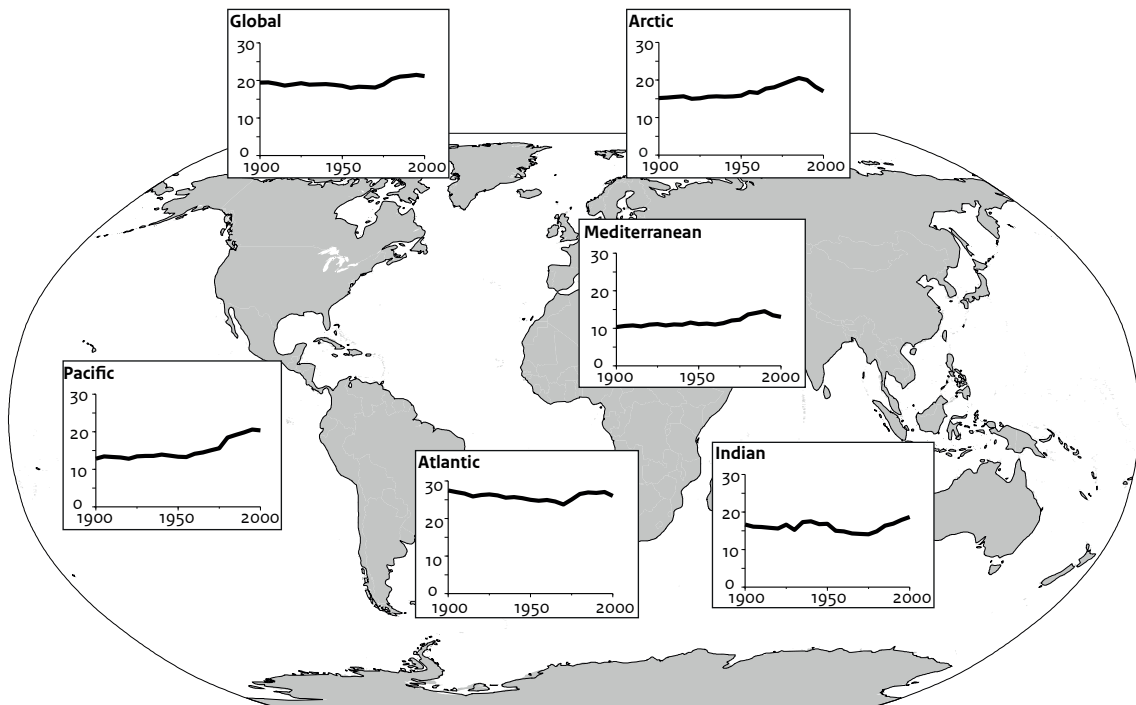

Supplement: Supplementary file 2 [file bg-13-2441-2016-supplement.zip]

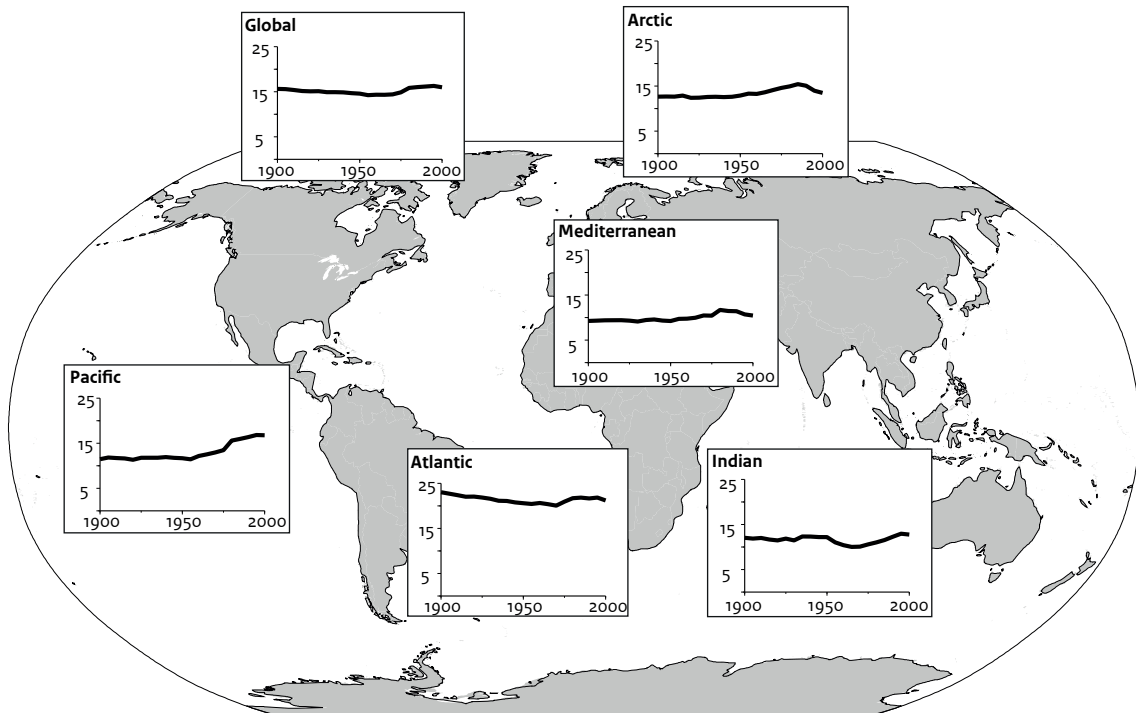

Supplement: Supplementary file 4 [file bg-13-2441-2016-supplement.zip]
